# Silencing Abnormal Wing Disc Gene of the Asian Citrus Psyllid, *Diaphorina citri* Disrupts Adult Wing Development and Increases Nymph Mortality

Ibrahim El-Shesheny<sup>1,3</sup>, Subhas Hajeri<sup>2</sup>, Ibrahim El-Hawary<sup>3</sup>, Siddarame Gowda<sup>2</sup>, Nabil Killiny<sup>1\*</sup>

**1** Department of Entomology and Nematology, Citrus Research and Education Center, IFAS, University of Florida, Lake Alfred, Florida, United States of America, **2** Department of Plant Pathology, Citrus Research and Education Center, IFAS, University of Florida, Lake Alfred, Florida, United States of America, **3** Department of Plant Protection, Faculty of Agriculture, Tanta University, Tanta, Egypt

## Abstract

Huanglongbing (HLB) causes considerable economic losses to citrus industries worldwide. Its management depends on controlling of the Asian citrus Psyllid (ACP), the vector of the bacterium, *Candidatus Liberibacter asiaticus* (CLas), the causal agent of HLB. Silencing genes by RNA interference (RNAi) is a promising tool to explore gene functions as well as control pests. In the current study, abnormal wing disc (*awd*) gene associated with wing development in insects is used to interfere with the flight of psyllids. Our study showed that transcription of *awd* is development-dependent and the highest level was found in the last instar (5<sup>th</sup>) of the nymphal stage. Micro-application (topical application) of dsRNA to 5<sup>th</sup> instar of nymphs caused significant nymphal mortality and adult wing-malformation. These adverse effects in ACP were positively correlated with the amounts of dsRNA used. A qRT-PCR analysis confirmed the dsRNA-mediated transcriptional down-regulation of the *awd* gene. Significant down-regulation was required to induce a wing-malformed phenotype. No effect was found when dsRNA-*gfp* was used, indicating the specific effect of dsRNA-*awd*. Our findings suggest a role for *awd* in ACP wing development and metamorphosis. *awd* could serve as a potential target for insect management either via direct application of dsRNA or by producing transgenic plants expressing dsRNA-*awd*. These strategies will help to mitigate HLB by controlling ACP.

**Citation:** El-Shesheny I, Hajeri S, El-Hawary I, Gowda S, Killiny N (2013) Silencing Abnormal Wing Disc Gene of the Asian Citrus Psyllid, *Diaphorina citri* Disrupts Adult Wing Development and Increases Nymph Mortality. PLoS ONE 8(5): e65392. doi:10.1371/journal.pone.0065392

**Editor:** Randall P. Niedz, United States Department of Agriculture, United States of America

**Received:** March 5, 2013; **Accepted:** April 29, 2013; **Published:** May 29, 2013

This is an open-access article, free of all copyright, and may be freely reproduced, distributed, transmitted, modified, built upon, or otherwise used by anyone for any lawful purpose. The work is made available under the Creative Commons CC0 public domain dedication.

**Funding:** Ibrahim El-Shesheny was supported with a scholarship from the Egyptian government. The funders had no role in study design, data collection and analysis, decision to publish, or preparation of the manuscript.

**Competing Interests:** The authors have declared that no competing interests exist.

\* E-mail: nabilkilliny@ufl.edu

These authors contributed equally to this work.

## Introduction

Flying ability is an important evolutionary transition. It requires combination of morphological, physiological, and behavioral features [1]. Only four groups of animals have developed the ability to fly. The three extant groups are bats, birds, and insects. The latter two groups have true wings [2]. However, insects are the “only group of invertebrates that includes members capable of active flight” [3].

Many proteins and hormones and their analogues are implicated in the development of wings and flying ability [4,5,6,7,8,9,10,11,12,13]. Wing discs and other imaginal discs, are cells in the larval stage of insects that remain diploid and continue to divide by normal division in order to differentiate into adult organs [6]. The abnormal wing disc (*awd*) gene of *Drosophila* encodes a soluble protein with nucleoside diphosphate kinase (NDPK) activity. The main function of NDPK is to catalyze the exchange of phosphate groups between different nucleoside diphosphates [14]. The *awd* also regulates wing development in insects such as *Drosophila melanogaster*, *Bombyx mori* and *Antheraea pernyi* [6,15,16]. Complete loss of AWD/NDPK function (null mutation) in *D. melanogaster* causes lethality after the larval stage.

Most larval organs in this null mutant appear to be normal, but the imaginal discs are small and incapable of normal differentiation [17,18]. The product of *awd* in *Antheraea pernyi* has also been shown to contribute to insect temperature tolerance [16].

Silencing genes by RNA interference (RNAi) is a promising tool for controlling pests [19]. The use of anti-sense (nonsense) RNA strand transcription to inhibit gene activity has been used since the 80's [20]. The efficacy of anti-sense silencing depends on hybridization between the injected RNA and endogenous messenger. It was first demonstrated in the nematode *Caenorhabditis elegans* [21] where the double-stranded RNA (dsRNA) produced interference more effectively than individual strands [22]. Subsequently, RNAi using dsRNA was attempted in insect research, but initially it was difficult to achieve silencing. For example, the percentages of abnormal larvae of *Spodoptera exigua* were 11.67% and 31.67% after 24 hours and 72 hours post-injection with dsRNA of chitin synthase gene A, respectively [23,24].

Many RNAi studies in insects relate to insect immunity [25,26,27], embryonic development [28,29,30], metamorphosis [9,31,32], integument and morphogenesis [33,34,35,36], and communication and behavior [37,38,39,40].

RNAi experiments have been conducted on insects that belong to different taxonomic groups, particularly Holometabolous insects: Lepidopterans; *Bombyx mori*, *Manduca sexta*, *Helicoverpa armigera* [41], *Spodoptera Exigua* [23,42] *Plutella xylostella* [26], dipterans; *D. melanogaster*, *Bactrocera Dorsalis* [43], and coleopterans; *Diabrotica virgifera* [44,45]. Fewer studies have been carried out on Hemimetabolous insects: Isoptera; termite *Reticulitermes flavipes* [46], Orthoptera; *Locusta migratoria* [47] *Gryllus bimaculatus* [40]; Hemiptera and Homoptera; *Rhodnius prolixus* [48], *Nilaparvata lugens* [49,50], *Laodelphax striatellus* [50], *Bemisia tabaci* [51] *Bacterocera cockerelli* [52] and *Acyrtosiphon pisum* [53]. RNAi using dsRNA has been shown to be innovative as a potential alternative technique in insect management compared to insecticide application.

Huanglongbing (HLB), or citrus greening, seriously threatens the citrus industry in Asia, Africa, and the Americas [54,55,56,57,58,59,60]. The First recorded incidence of HLB in Florida was in 2005; since then it has spread rapidly throughout the state [61]. HLB management critically depends on the control of the Asian citrus psyllid (ACP), *Diaphorina citri* Kuwayama (Hemiptera: Psyllidae), the vector of *Candidatus Liberibacter asiaticus* (CLas) bacteria, the causal agent of HLB. The psyllids are a group of small, plant phloem sap-sucking, hemipteran insects belong to superfamily Psylloidea and family Psyllidae. Along with aphids, scale insects, mealy-bugs, and whiteflies, they belong to the group Sternorrhyncha. There are over 3000 described species of psyllids, and the genus *Diaphorina* contains more than 50 species. *D. citri* is the most serious pest of citrus. Its direct damage occurs from the phloem sap feeding of nymphs and adults, but the real threat is as a vector of CLas, the causal bacteria of HLB [56,62]. The psyllid acquires CLas bacteria while feeding on infected trees, and then transmits the bacteria after flying to healthy trees for further feeding. Disruption of its flying ability potentially would prevent the spread of HLB. *awd* has been sequenced and annotated for ACP (accession number ABG81980.1). In this study, we report 1) the role of *awd* in ACP development and wing formation and 2) interference of *awd* transcription by micro-application of dsRNA to ACP nymphs.

## Materials and Methods

### Insect culture

Colonies of ACP have been maintained in cages on the sweet orange 'Valencia', in temperature controlled growth rooms set at 25±2°C temperature, 60±5% RH, and a 16:8 (L:D) photoperiod [63]. For the bioassay and the RT-PCR analysis, seven ACP stages were used and they included 1<sup>st</sup>, 2<sup>nd</sup>, 3<sup>rd</sup>, 4<sup>th</sup>, and 5<sup>th</sup> nymph instars, and both teneral and mature adults. Different nymph instars were collected in Petri dishes using a hair brush; each nymph was examined morphologically under a stereomicroscope, then classified based on morphological features into its instars [64,65,66,67]. Teneral and mature adults were collected using an aspirator.

### Genetic manipulation

**In silico analysis of *awd*.** The protein sequence ABG81980.1 from ACP identified as a putative abnormal wing disc-like protein was used to generate a protein sequence multiple alignments with orthologs using Clustal W [68] and BOXSHADE 3.21 (<http://www.ch.embnet.org/index.html>) to visualize conserved regions in the alignment. The GENO3D server [69] was used to predict secondary structure agreement to validate template selection and alignment by generating a three-dimensional structure and a model for the molecular surface of putative abnormal wing disc-like protein. The 3-D protein-structure model

was generated based on identification of 76% (117/152) and positives 90% (137/152) with PDB 1nd1A which represent the structure of the AWD nucleoside diphosphate kinase from *D. melanogaster* in the protein data bank (PDB, <http://www.rcsb.org>). The predicted macromolecule in the Protein Database File (PDB) was visualized using the software FirstGlance in Jmol (<http://molvis.sdsc.edu/fgij/>). The prediction of RNA secondary structure for *awd* was performed from the RNA sequence using Centroid-Fold sequence (<http://www.ncrna.org/centroidfold>).

**Gene expression analysis.** RNA from nymphal instars and adults was extracted using TriZol reagent and 25 nymphs or adults for each developmental stage or instar with five biological replicates for each. Single stranded RNA was purified using ssDNA/RNA Clean & Concentrator™ (Zymo Research). The concentration and purity of isolated single stranded RNA were determined using NanoDrop. SYBR Green I based quantitative RT-PCR (qRT-PCR) was used to monitor the expression levels of *awd* during different developmental stages of ACP, and also to determine the down-regulation of *awd* in dsRNA treated ACP. Samples were run in triplicate of each biological replicate. PCR primers were, *awd*-RT-F 5' AGAGGACTTGTGGGAAACATC 3' and *awd*-RT-R 5'

TGACAAGACCAGGGAAGAAAG 3'. Amplification was performed with a Fast ABI 7500 real-time PCR system (Applied Biosystems) using SYBR green technology. *Alpha-tubulin* was used as a non-target gene (control). To compare the relative gene expression among treatments, we normalized gene expression to *Actin* (reference gene).

**Synthesizing of the dsRNA.** Putative abnormal wing disc-like protein (*awd*) mRNA of ACP is 462 bp in length (GenBank: DQ673407.1). Specific primers (forward primer with PacI; 5' GCCGAACCCAAGGAAAGAAGACTTTTCTCATG 3' and Reverse primer with StuI; 5' TTATTCATAGATCCAGGATTCACTGGCATTG

3' were designed to fully amplify the *awd* gene excluding the start codon. Total RNA from ACP was extracted using Trizol reagent (Life Technologies corp.) as per manufacturer instructions. SuperScript® III One-Step RT-PCR System with Platinum® Taq DNA Polymerase (Life Technologies corp.) was used to amplify the product of 459 bp, that was gel purified using GENECLAN® III kit (MP Biomedicals) and used for TA cloning into pGEM-T vector (Promega corp.). *awd*/pGEM-T vector was sequenced using universal T7 promoter primer to confirm the cloned AWD sequence. *awd*/pGEM-T vector was linearized by restriction digesting with *Nco*I or *Spe*I to generate sense and antisense transcripts using Ambion® MAXIscript® T7/SP6 In Vitro Transcription Kit (Life Technologies corp.) respectively. To produce *awd* double-stranded (ds) RNAs, sense and antisense transcript were annealed in a single tube by denaturing at 70°C for 10 min followed by slow cooling to room temperature for 20 min. To eliminate the DNA template and single-stranded RNAs, annealed dsRNA was treated with RQ DNase I (Promega corp.) and RNase A (Sigma-Aldrich Co.). The resulting dsRNA was extracted with Phenol:Chloroform:Isoamyl Alcohol (25:24:1, v/v). The amount of purified dsRNA was measured by the NanoDrop spectrophotometer. We used dsRNA-*gfp* as an irrelevant dsRNA (control). dsRNA-*gfp* was produced as described above. Green fluorescent protein (GFP) mRNA is 732 bp in length. Specific primers (Forward primer with *Spe*I: 5'-GCCAAGCTAGTATGGC-TAGCAAAGGAGAAGAAGACTTTTCACTG -3' and Reverse primer with *Sac*II: 5'-GAGACCGGGCTACCCCTCGAGT-TATTTGTAGAGCTCATC -3') were used to amplify full-length GFP gene by using TMV-30BGFP.

## Insect bioassay

For all insect bioassays, greenhouse maintained CLas-free 'Valencia' orange seedlings were used. During the insect assays, ACP adults and nymphs were reared on citrus seedlings of 6 to 8 true leaves stage covered with plastic cylindrical shaped containers (15 cm diameter and 50 cm high). The bottom opening of this cylinder was slipped over the soil around the seedling, and the upper opening was covered with mesh screen for ventilation.

## The application of dsRNA

For ventral epidermal (cuticular) micro-application of dsRNA, the nymphs were collected, and 0.3  $\mu$ l of dsRNA was applied to individual 5<sup>th</sup> instar nymphs with a micro-pipette. The dsRNA was placed ventrally on the thorax region between the three pairs of legs and the drop was allowed to be absorbed for approximately 60 seconds. Four concentrations of dsRNA-*awd*: 0.03, 0.3, 3 and 30  $\mu$ g/ $\mu$ l, were tested. RNAase free water and dsRNA-*gfp* were used as controls. The nymphs were then transferred onto the citrus seedlings, and covered with the plastic cylindrical shaped containers. Five replicates (12 nymphs each) were used for each treatment.

## Abnormality and survival rates determination

Treated nymphs were observed every 24 h to determine the day of adult eclosion and mortality of nymphs. Newly emerged adults were collected and examined for wing malformation and photographed using a Canon Power Shot S3IS digital camera, Leica M3Z stereomicroscope.

## Statistical analysis

Data were analyzed using Minitab® 16.1.0 software. Analysis of variance (ANOVA) was performed on the mean percentages of nymph mortality and wing-malformation with different treatments, followed by means separation according to the Fisher method. All values in figures represent means with standard deviations. Concentration values were logarithmically transformed prior to regression analysis to determine mean percentages of nymph mortality and adult wing malformation.

## Results

### *In silico* analyses of *awd* in ACP

The genome of ACP contains *awd* (ABG81980.1) which encodes a putative abnormal wing disc like-protein also known as nucleoside diphosphate kinase (NDPK) containing 153 amino acids with a predicted molecular mass of 17.1 kDa, and 7.82 isoelectric point. The multiple alignment of the amino acid sequence of ACP-AWD protein with the sequences of other known AWD/NDPK revealed that *Apis mellifera*, and *D. melanogaster* showed high similarity and conserved sequences while less similarity was observed with *Acyrtosiphon pisum*. Similarities were also found in plants (*Arabidopsis thaliana*), and CLas str. psy62. Interestingly, we did not find any homology to AWD of ACP in the genome of citrus (*Citrus sinensis* (L.)), the main host of ACP. AWD/NDPKs active site motif has been determined to be N-x-x-H-[G/A]-S-D [70,71]. The motif site amino acid sequence of AWD from ACP was detected in all organisms used for alignment (Fig. 1A). The predicted three-dimensional secondary structure of AWD with 90% similarity to AWD/NDPK of *D. melanogaster* and the conserved motif site are shown in Fig. 1B. These results suggest that the motif site of AWD-NDPK is conserved and functional. Predicted mRNA hairpin secondary structure of *awd* and the strengths of base pairing probabilities are shown in Fig. 1C.

## AWD is implicated in ACP Development

Gene expression analysis was carried out to determine the transcription of *awd* at different developmental stages. Stages included 1<sup>st</sup>, 2<sup>nd</sup>, 3<sup>rd</sup>, 4<sup>th</sup>, and 5<sup>th</sup> nymph instars, and teneral and mature adults. qRT-PCR showed that the expression of *awd* was up-regulated gradually from the 1<sup>st</sup> nymph instar and reached the highest expression in the 5<sup>th</sup> nymph instar showing slight down-regulation in the teneral adult stage (Fig. 2). Higher down-regulation was observed in the mature adults. These findings suggest that expression of *awd* varied throughout the nymphal and adult development. The expression of *awd* was observed to be 3 fold higher in 5<sup>th</sup> instars compared to the 1<sup>st</sup> instar.

## Silencing of *awd* in nymphs by dsRNA causes increased mortality

The main objective of this study is to disrupt wing development in ACP as a means to interfere with psyllid flight for prevention of HLB spread in citrus. We targeted *awd* for silencing using dsRNA since it is implicated in the formation of wings in ACP and any interference could inhibit ability to fly. Towards this end, two major biological parameters were investigated: 1) the mortality of nymphs due to the application with dsRNA-*awd*; if the silencing of the *awd* in nymphs would alter their survival and 2) wing malformation in adults. Since the highest expression of *awd* was observed in the 5<sup>th</sup> instar of nymph, we attempted to silence the expression of *awd* by RNAi in this stage of nymph development. Incremental amounts (ten-folds) of dsRNA-*awd*, 10, 1.0, 0.10, and 0.01  $\mu$ g, and water as control were applied for each nymph and the experiment was conducted in five replicates. We also used dsRNA-*gfp* as an irrelevant dsRNA (control). dsRNAs was applied via cuticular micro-application, ventrally on thorax region (sternites) between the three pairs of legs of the 5<sup>th</sup> instar nymphs. There were significant differences in mortality among six treatments (df, 5; F, 7.25; P, 0.004) (Fig. 3A). Significant differences were not observed among the highest three concentrations of dsRNA-*awd* (10, 1.0, 0.10, and 0.01  $\mu$ g/nymph) which caused mortality of  $61 \pm 4.58\%$ ,  $51.52 \pm 2.62\%$ , and  $47.58 \pm 18.77\%$ , respectively. Differences were also not observed between 0.01  $\mu$ g/nymph of dsRNA-*awd* application and controls (water and dsRNA-*gfp*), showed  $27.98 \pm 11.68\%$ ,  $18.89 \pm 1.92\%$ , and  $23.33 \pm 5.77\%$  respectively (Fig. 3A). No significant difference was found between treatment with water and treatment with dsRNA-*gfp* indicating a specific effect of dsRNA-*awd*. A regression coefficient analysis between mortality and log-dose showed a significant positive relationship ( $b = 10.3$ ,  $P = 0.042$ , and  $R^2 = 0.92$ ).

## Treatment of ACP nymphs with dsRNA-*awd* causes wing malformations

Highly significant abnormalities of wing formation in the emerged adults were been observed among treatments (df, 5; F, 11.57;  $P > 0.001$ ) (Fig. 3B). The percentages of wing-malformed emerged adults were  $42.68 \pm 3.7\%$ ,  $31 \pm 13.42\%$ ,  $24.41 \pm 7.81\%$  and  $13.06 \pm 3.37\%$  in nymphs treated with concentrations of 30  $\mu$ g/ $\mu$ l, 3  $\mu$ g/ $\mu$ l, 0.3  $\mu$ g/ $\mu$ l and 0.03  $\mu$ g/ $\mu$ l of dsRNA-*awd* respectively. Thus the application of dsRNA-*awd* affected the development of adult wings. No wing-malformed adults occurred in controls (water or dsRNA-*gfp*). The regression coefficient between malformation percentages and Log-dose was significant ( $b = 9.6$ ,  $P = 0.001$ , and  $R^2 = 0.99$ ). Various forms of wing malformation were observed (Fig. 4). In some cases, the complete eclosion of wing-malformed adults was not observed and the exicuvium tightly attached to the teneral adult. Wing malformation

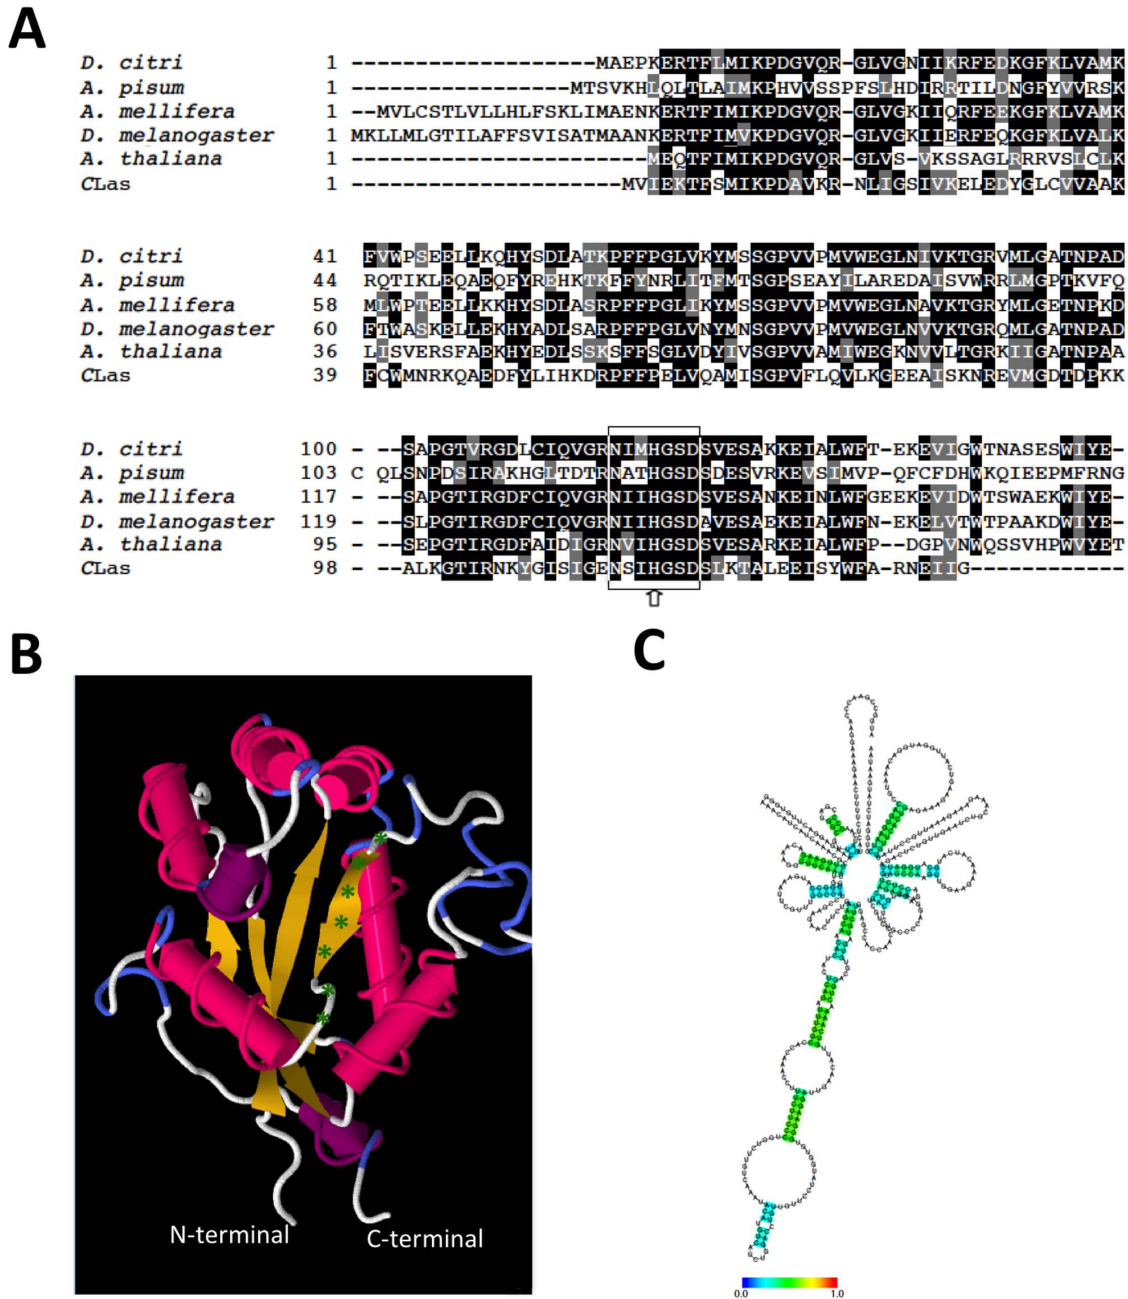

**Figure 1. *In silico* analysis of AWD protein sequence and mRNA.** Alignment of AWD amino acid sequences from *Diaphorina citri*, *Acyrtosiphon pisum*, *Apis mellifera*, *Drosophila melanogaster*, *Arabidopsis thaliana*, and *Candidatus Liberibacter asiaticus* str. *psy62*. Conserved amino acids are indicated with black shading and those with high similarity score are in gray. The NPKD motif is surrounded by box and pointed to by arrow (A). Predicted three-dimensional structure of AWD with 90% similarity of AWD-NPKD from *Drosophila melanogaster*. NPKD motif is indicated by green asterisks (B). Predicted mRNA hairpin secondary structure of *awd*. Colors represent strengths with base pairing probabilities (C). doi:10.1371/journal.pone.0065392.g001

sometimes happened in one or both forewings or hind-wings. In some cases, one side or even both sides were malformed. Some abnormalities of dorsal sclerites in thorax tergites were observed (Fig. 4). We also noticed that wing-malformed adults could not move normally or fly. These results suggest an important role for the AWD/NPKD in the development of wings in ACP.

**Wing malformation depends on degree of silencing**

To demonstrate silencing of *awd* at the molecular level, analysis of *awd* expression was conducted by qRT-PCR. Three types of

adults were examined; normal looking adults developed from treated nymphs; wing-malformed adults developed from treated nymphs and adults from control nymphs. qRT-PCR results demonstrated that *awd* is down-regulated in both types of adults that developed from dsRNA-*awd* treated nymphs compared to the control (Fig. 3C). A pronounced down-regulation of *awd* was found in wing-malformed adults with 70% of reduction of expression level compared to control groups. On the other hand, the expression of *awd* was also down-regulated in normal-looking adults developed from treated nymphs but not to the same level as

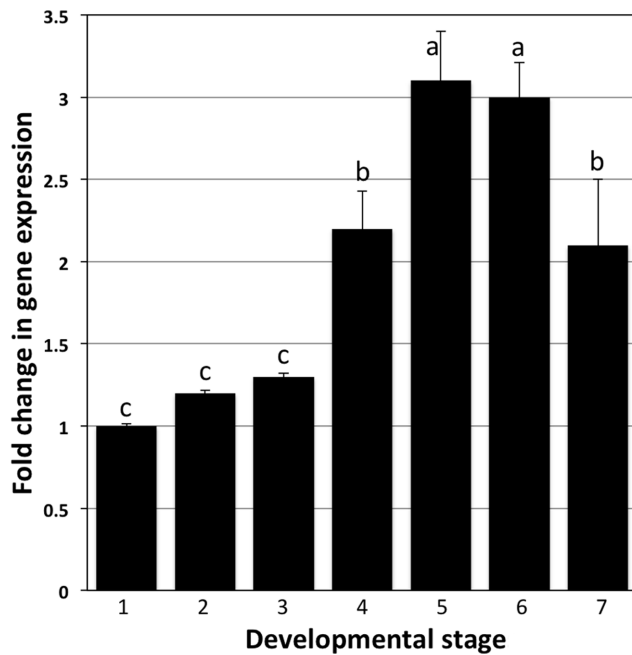

**Figure 2. The relative expression level of *awd* using qRT-PCR during different developmental stages of ACP.** 1- the 1<sup>st</sup> instar, 2- the 2<sup>nd</sup> instar, 3- the 3<sup>rd</sup> instar, 4- the 4<sup>th</sup> instar, 5- the 5<sup>th</sup> instar, 6- the general adult, and 7- the mature adult of ACP. Actin gene was used as internal normalization control. Bars represent the standard deviations. Different letters indicate statistically significant differences ( $P < 0.05$ ) doi:10.1371/journal.pone.0065392.g002

in the wing-malformed adults. These findings suggest that a significant gene down-regulation is required to induce the malformed wing phenotype.

## Discussion

Determination of the suitable stage for dsRNA treatment is crucial for inducing silencing in ACP. In this study, the 5<sup>th</sup> instar nymphs were chosen to be the optimal stage for dsRNA-*awd* application for silencing the endogenous psyllid gene (Fig. 4A, C). Silencing has been observed in specific stage and/or specific instars of insects, and not others [48,72]. This may relate first to the nature of the targeted gene and its functions, then susceptibility of different stages to RNAi and the suitability of delivery method. In the current work, the selected gene, abnormal wing disc gene (*awd*) is known to regulate wing development in insects [6,15]. Additionally, gene expression at different stages of ACP indicated that the expression of the *awd* gene increased progressively during the nymphal stage until the 5<sup>th</sup> instars, then decreased in the adults (Fig. 2). This suggests that the product of *awd* is vital during later nymphal stages, and targeting it by RNAi during these stages could potentially affect biological functions. The fact that *awd* expression level was higher during the last instar of the nymphal stage indicates the importance of *awd* in the development and differentiation processes of discs during metamorphosis of ACP. In other insects, *awd* has been implicated in many biological functions such as imaginal discs development, and its complete loss produced lethal mutations and death at the end of the larval stage or during the pupal stage [6,73,74].

The delivery of dsRNA is considered to be a limiting factor and must be considered when assessing the effectiveness of RNAi. Silencing potentially would occur once dsRNA is efficiently

delivered inside the cell. There are three main methods of dsRNA delivery: injection, ingestion, and epidermal (cuticular) application. In the present study, dsRNA-*awd* was delivered via cuticular micro-application to 5<sup>th</sup> instars nymph stage. To date, most RNAi studies in insects have been conducted using micro-injection or by feeding through artificial diet systems. Although, micro-injection of dsRNA has been reported, and in some cases silencing occurred successfully as observed in piercing-sucking insects such as Hemiptera and Homoptera, the silencing levels varied widely [24,50,75]. In addition, it is hard to deliver dsRNA to the insect hemocoel via micro-injection to small and soft insect stages. Therefore, feeding of dsRNA is a more common approach than micro-injection. But, the success of RNAi through feeding application usually requires high amounts of dsRNA since it is suitable to degradation during feeding and inside the insect gut. Few studies using feeding delivery were carried out with psyllids, and silencing was not successful with some of the target genes [52]. It would be very useful if the silencing signal passes through the insect gut systemically to other tissues. In most cases of successful silencing studies, the mid-gut is the primary target organ and mid-gut tissue genes were the main targets [19,37,76]. However, Some systemic silencing after dsRNA delivery through feeding has been observed [40].

Insect cuticle might appear refractory to dsRNA application, since no silencing studies were carried out in insects via cuticular micro-application. In targeting epidermis and disruption of chitin synthesis during molting, micro-injection has been used [23]. However, our study demonstrates that ventral cuticular micro-application of dsRNA-*awd* allowed dsRNA uptake through the exoskeleton of the psyllid nymphal stage. The uptake was probably occurred via inter-segmental membranes especially in ventral portions (sterna), through membranes between articulation plates and cavities of appendage bases (legs and wing) and through the lateral portions on each side (pleura) including the spiracles. We have thus shown that micro-application of dsRNA could be an alternative method for the delivery of dsRNA to soft bodied stages in the soft and tiny insect life cycle. The flexible membranes between sclerites and around articulation cavities especially in soft cuticle of immature insects contain a thin exocuticle which make these parts soft and water-permeable [77,78,79,80]. It was reported that even low polarity substances penetrate the insect cuticle through intersegmental membranes [81], wax and pore canals [82]. The complete morphology and the arrangement of the dorsal and ventral sclerites of ACP 5<sup>th</sup> instar had been described in detail by White and Honkinson [83]. The ventral side of the 5<sup>th</sup> nymphal instar of psyllids has less sclerites and more membrane area between plates and around articulation cavities of legs exist than on dorsal side. Indeed, the dorsoventral side has the prothoracic tergum continuous with the dorsal surface of the mesothoracic. Most of the sclerites are fused with the head to form the 'cephaloprothorax'. Psyllida have at least 2+2 sclerites between the mesothorax and cephaloprothorax. The mesothorax tergum is completely fused. Metathorax also, has the same form as the mesothorax. The abdominal sclerites are arranged at least 1+1 per segment, but in the epical area the individual sclerites are often fused, whereas, the ventral abdominal surface of most species has 2+2 sclerites and the areas between these sclerites are membranous [83].

The results presented here clearly demonstrate that dsRNA is a powerful agent for gene silencing and mediates post-transcriptional down-regulation of *awd* transcripts as confirmed through qRT-PCR and the morphological changes in some adults developing from treated nymphs. We also measured positive correlation between the dsRNA concentrations and mortality and wing malformation. A

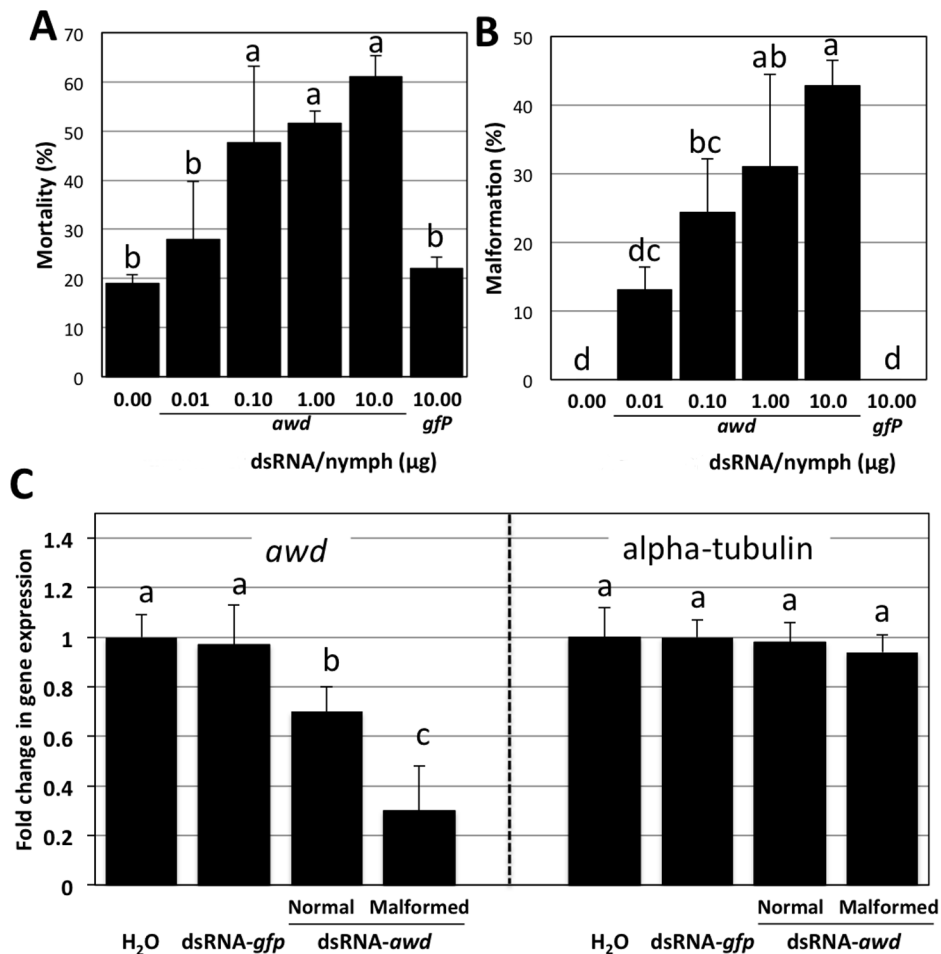

**Figure 3. Effects of dsRNA-*awd* on ACP mortality and malformation.** Mortality of 5<sup>th</sup> instar of nymphs treated with different amount of dsRNA (A). Wing-malformed adults developed from treating 5<sup>th</sup> instars of nymphs with different amount of dsRNA (B). Relative *awd* and *alpha tubulin* expression using qRT-PCR in normal looking and wing-malformed adults obtained from 5<sup>th</sup> instar nymphs treated with 1µg/nymph of dsRNA-*awd* or 10µg/nymph of dsRNA-*gfp* (C). Each nymph was treated with 0.3ul volume that contains one of the indicated amounts of dsRNA. Bars represent the standard deviations. Different letters indicate statistically significant differences ( $P < 0.05$ ) doi:10.1371/journal.pone.0065392.g003

relationship between dsRNA concentrations and silencing level probably is determined by the method of dsRNA delivery and the group of insects involved. Whereas, correlations between dosage and effectiveness of RNAi have been shown in some dsRNA injection studies [19,84,85], it did not occur in lepidopteran insects, perhaps due to systemic RNAi sensitivity/resistance differences among different groups of insects [24].

The results of gene expression analysis indicated that *awd* is down-regulated in both normal and wing-malformed adults obtained from treated nymphs compared to the control (Fig. 3C). A higher down-regulation of *awd* in wing-malformed adults was found. The malformed wing phenotypes resulting from the RNAi are probably caused by down-regulation/mal-functionality of many important metabolic pathway intermediates, especially those related to wing formation. Down-regulation of *awd* in normal looking adults that developed from treated nymphs suggests that higher levels of silencing are required to affect wing-malformed phenotype.

Further studies are required to improve the micro-application dsRNA delivery and to explore other functions of AWD such as NDPK activity. Pest control strategies using RNAi via dsRNA could be tailored for use against a single pest or groups of related

species [19]. We have explored the implication of AWD in wing development, and our results strongly suggest that *awd* could be a potential target for insect management either via direct application of dsRNA or via citrus plants expressing dsRNA against the *awd* gene. RNAi-mediated silencing of some genes of insect pests has been reported in transgenic plants such as transgenic corn expressing V-ATPase A dsRNA against *Diabrotica virgifera* [44] and cotton expressing dsRNA of CYP6AE14 against *Helicoverpa armigera* [86] and these strategies, if applied to citrus, will impact the spread of HLB by controlling the psyllids.

### Acknowledgments

We thank Dr. Bill Dawson for the helpful discussion. We acknowledge our lab members for the technical assistance and the useful discussion. Ibrahim El-Shesheny was supported with a scholarship from the Egyptian government.

### Author Contributions

Conceived and designed the experiments: NK SG. Performed the experiments: IEs SH. Analyzed the data: NK IEs IEh. Contributed reagents/materials/analysis tools: NK IEs SH. Wrote the paper: NK IEs SG IEh.



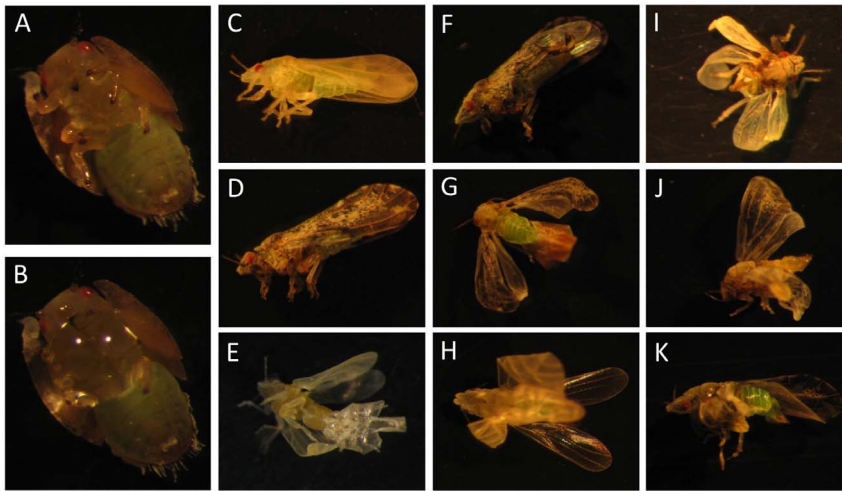

**Figure 4. Micro-application of *awd*-dsRNA and its effects on ACP wing formation.** The 5<sup>th</sup> instar nymph on its back side (A). Drop of dsRNA-solution on the abdominal side between legs in the thorax region of the 5<sup>th</sup> instar nymph (B). Control ACP mature adult (C). Control ACP teneral adult (D). Different types of wing malformation observed on adults emerged from treated nymphs (E–K). Strongly attached exicuva to teneral adult (E). Malformation in one forewing (F). Both forewings and hindwings are malformed and the adult cannot emerge completely (G). Malformation in the both forewings but not in hindwings (H). Both forewings and hindwings are malformed (I). All wings malformed and one side is severer than other side. Note also the abnormal dorsal tergites (J). Malformation in one side both forewing and hindwing (K).  
doi:10.1371/journal.pone.0065392.g004

## References

- Dudley R, Byrnes G, Yanoviak SP, Borrell B, Brown RM, et al. (2007) Gliding and the Functional Origins of Flight: Biomechanical Novelty or Necessity? *Annu Rev Ecol Syst* 38: 179–201.
- Lewin R (1985) On the Origin of Insect Wings: Experimental data on thermoregulation and aerodynamics give the first quantitative test of a popular hypothesis for the evolution of flight in insects. *Science* 230: 428–429.
- Romoser W, Stoffolano J G (1998) *The Science of Entomology*. McGraw-Hill Companies Inc., Boston, MA., 326 p.
- Baldassari N, Baronio P, Nmec V, Rejzek M, Wimmer Z (1997) Control of *Cacopsylla (Psylla) pyri* (L.) (Stenorrhyncha, Psyllidae) by juvenile hormone analogues. *J Appl Ent* 121: 343–351.
- Goberdhan DC, Paricio N, Goodman EC, Mlodzik M, Wilson C (1999) *Drosophila* tumor suppressor PTEN controls cell size and number by antagonizing the Chico/PI3-kinase signaling pathway. *Genes Dev* 13: 3244–3258.
- Timmons L, Shearn A (2000) Role of AWD/nucleoside diphosphate kinase in *Drosophila* development. *J Bioenerg Biomembr* 32: 293–300.
- Matsunaga TM, Fujiwara H (2002) Identification and characterization of genes abnormally expressed in wing-deficient mutant (*flagella*) of the silkworm, *Bombyx mori*. *Insect Biochem Mol Biol* 32: 691–699.
- Dewey EM, McNabb SL, Ewer J, Kuo GR, Takamishi CL, et al. (2004) Identification of the gene encoding bursicon, an insect neuropeptide responsible for cuticle sclerotization and wing spreading. *Curr Biol* 14: 1208–1213.
- Huang J, Zhang Y, Li M, Wang S, Liu W, et al. (2007) RNA interference-mediated silencing of the bursicon gene induces defects in wing expansion of silkworm. *FEBS Lett* 581: 697–701.
- Koyama T, Syropyatova MO, Riddiford LM, (2008) Insulin/IGF signaling regulates the change in commitment in imaginal discs and primordia by overriding the effect of juvenile hormone. *Dev Biol* 324: 258–265.
- Sato K, Matsunaga TM, Futahashi R, Kojima T, Mita K, et al. (2008) Positional Cloning of a *Bombyx* wingless locus *flagellos* (*fl*) reveals a crucial role for fringe That Is Specific for Wing Morphogenesis. *Genetics* 179: 875–885.
- Cohen B, McGuffin ME, Pfeifle C, Segal D, Cohen SM (1992) apterous, a gene required for imaginal disc development in *Drosophila* encodes a member of the LIM family of developmental regulatory proteins. *Genes Dev* 6: 715–729.
- Konopova B, Smykal V, Jindra M (2011) Common and Distinct Roles of Juvenile Hormone Signaling Genes in Metamorphosis of Holometabolous and Hemimetabolous Insects. *PLoS One* 6: e28728.
- Berg JM, Tymoczko JL, Stryer L (2002) *Biochemistry - 5<sup>th</sup> Edition*. WH Freeman and Company. 476 p.
- Zhao XN, Tong DF, Jiang CY, Zhang YZ (2009). Expression and purification of abnormal wing disc gene from silkworm, *Bombyx mori*. *Bull [in Chinese] Sericulture* 40: 20–25.
- Jiang DF, Liu YQ, Li XS, Shi SL (2010) Characterization of the *Antheraea pernyi* abnormal wing disc gene that may contribute to its temperature tolerance. *African J Biotech* 9: 7372–7378.
- Rosengard AM, Krutzsch HC, Shearn A, Biggs JR, Barker E, et al. (1989) Reduced Nm23/Awd protein in tumour metastasis and aberrant *Drosophila* development. *Nature* 342: 177–180.
- Biggs J, Hersperger E, Steeg PS, Liotta LA, Shearn A (1990) A *Drosophila* gene that is homologous to a mammalian gene associated with tumor metastasis codes for a nucleoside diphosphate kinase. *Cell* 63: 933–940.
- Whyard S, Singh AD, Wong S (2009) Ingested double-stranded RNAs can act as species-specific insecticides. *Insect Biochem Mol Biol* 39: 824–832.
- Izant J, Weintraub H (1984) Inhibition of thymidine kinase gene expression by antisense RNA: a molecular approach to genetic analysis. *Cell* 36: 1007–1015.
- Fire A, Albertson D, Harrison S, Moerman D (1991) Production of antisenseRNA leads to effective and specific inhibition of gene expression in *C. elegans* muscle. *Development* 113: 503–514.
- Fire A, Xu S, Montgomery MK, Kostas SA, Driver SE, et al. (1998) Potent and specific genetic interference by double-stranded RNA in *Caenorhabditis elegans*. *Nature* 391: 806–810.
- Chen X, Tian H, Zou L, Tang B, Hu J, et al. (2008). Disruption of *Spodoptera exigua* larval development by silencing chitin synthase gene A with RNA interference. *Bull Entomol Res* 98: 613–619.
- Terenius O, Papanicolaou A, Garbutt JS, Eleftherianos I, Huvenne H, et al (2011) RNA interference in Lepidoptera: An overview of successful and unsuccessful studies and implications for experimental design. *J Insect Physiol* 57: 231–245.
- Rajagopal R, Sivakumar S, Agrawal N, Malhotra P, Bhatnagar RK (2002) Silencing of midgut aminopeptidase N of *Spodoptera litura* by double-stranded RNA establishes its role as *Bacillus thuringiensis* toxin receptor. *J Biol Chem*. 277: 46849–46851.
- Bautista MA, Miyata T, Miura K, Tanaka T (2009) RNA interference-mediated knockdown of a cytochrome P450, CYP6BG1, from the diamondback moth, *Plutella xylostella*, reduces larval resistance to permethrin. *Insect Biochem Mol Biol* 39: 38–46.
- Yang Y, Zhu YC, Ottea J, Husseneder C, Leonard BR, et al. (2010) Molecular characterization and RNA interference of three midgut aminopeptidase N isoforms from *Bacillus thuringiensis*-susceptible and -resistant strains of sugarcane borer, *Diatraea saccharalis*. *Insect Biochem Mol Biol*. 40: 592–603.
- Masumoto M, Yaginuma T, Niimi T (2009) Functional analysis of Ultra bithorax in the silkworm, *Bombyx mori*, using RNAi. *Dev Genes Evol* 219: 437–444.
- Tomita S, Kikuchi A (2009) Abd-B suppresses lepidopteran proleg development in posterior abdomen. *Dev Biol* 328: 403–409.
- Liu W, Yang F, Jia S, Miao X, Huang Y (2008) Cloning and characterization of Bmrunt from the silkworm *Bombyx mori* during embryonic development. *Arch Insect Biochem Physiol* 69: 47–59.
- Dai H, Ma L, Wang J, Jiang R, Wang Z, et al. (2008) Knockdown of ecdysis-triggering hormone gene with a binary UAS/GAL4 RNA interference system

- leads to lethal ecdysis deficiency in silkworm. *Acta Biochim Biophys Sin* (Shanghai) 40: 790–795.
32. Hossain M, Shimizu S, Matsuki M, Imamura M, Sakurai S, et al. (2008) Expression of 20-hydroxycydysonone-induced genes in the silkworm brain and their functional analysis in post-embryonic development. *Insect Biochem Mol Biol* 38: 1001–1007.
  33. Tsuzuki S, Sekiguchi S, Kamimura M, Kiuchi M, Hayakawa Y (2005) A cytokine secreted from the subesophageal body is essential for morphogenesis of the insect head. *Mech Dev* 122: 189–197.
  34. Khajuria C, Buschman LL, Chen MS, Muthukrishnan S, Zhu KY (2010) A gut-specific chitinase gene essential for regulation of chitin content of peritrophic matrix and growth of *Ostrinia nubilalis* larvae. *Insect Biochem Mol Biol* 40: 621–629.
  35. Chen J, Tang B, Chen H, Yao Q, Huang X, et al. (2010) Different Functions of the Insect Soluble and Membrane-Bound Trehalase Genes in Chitin Biosynthesis Revealed by RNA Interference. *PLoS One* 5: e10133.
  36. Chen J, Zhang D, Yao Q, Zhang J, Dong X, et al. (2010) Feeding-based RNA interference of a trehalose phosphate synthase gene in the brown planthopper, *Nilaparvata lugens*. *Insect Mol Biol* 19: 777–786.
  37. Turner CT, Davy MW, MacDiarmid RM, Plummer KM, Birch NP, et al. (2006) RNA interference in the light brown apple moth, *Epiplatys posteitana* (Walker) induced by double-stranded RNA feeding. *Insect Mol Biol* 15: 383–391.
  38. Ohnishi A, Hashimoto K, Imai K, Matsumoto S (2009) Functional characterization of the *Bombyx mori* fatty acid transport protein (BmFATP) within the silk moth pheromone gland. *J Biol Chem* 284: 5128–5136.
  39. Hull JJ, Lec JM, Kajigaya R, Matsumoto S (2009) *Bombyx mori* homologs of STIM1 and Orail1 are essential components of the signal transduction cascade that regulates sex pheromone production. *J Biol Chem* 284: 31200–31213.
  40. Takahashi T, Hamada A, Miyawaki K, Matsumoto Y, Mito T, et al. (2009) Systemic RNA interference for the study of learning and memory in an insect. *J Neurosci Methods* 179: 9–15.
  41. Kumar M, Gupta GP, Rajam MV (2009) Silencing of acetylcholinesterase gene of *Helicoverpa armigera* by siRNA affects larval growth and its life cycle. *J Insect Physiol* 55: 273–278.
  42. Tang B, Wang S, Zhang F (2010) Two storage hexamerins from the beet armyworm *Spodoptera exigua*: Cloning, characterization and the effect of gene silencing on survival. *BMC Mol Biol* 11:65.
  43. Li X, Zhang M, Zhang H (2011) RNA Interference of Four Genes in Adult *Bactrocera dorsalis* by Feeding Their dsRNAs. *PLoS One* 6: e17788.
  44. Baum JA, Bogaert T, Clinton W, Heck GR, Feldmann P, et al. (2007) Control of coleopteran insect pests through RNA interference. *Nat Biotech* 25: 1322–1326.
  45. Rangasamy M, Siegfried BD (2012) Validation of RNA interference in western corn rootworm *Diabrotica virgifera virgifera* LeConte (Coleoptera: Chrysomelidae) adults. *Pest Manag Sci* 68: 587–591.
  46. Zhou X, Wheeler MM, Oi FM, Scharf ME (2008) RNA interference in the termite, *Reticulitermes flavipes* through ingestion of double-stranded RNA. *Insect Biochem Mol Biol* 38: 805–815.
  47. Zhang J, Liu X, Zhang J, Li D, Sun Y, et al. (2010) Silencing of two alternative splicing-derived mRNA variants of chitin synthase 1 gene by RNAi is lethal to the oriental migratory locust, *Locusta migratoria* manilensis (Meyen). *Insect Biochem Mol Biol* 40: 824–833.
  48. Araujo RN, Santos A, Pinto FS, Gontijo NF, Lehane MJ, et al. (2006) RNA interference of the salivary gland nitrophorin 2 in the triatomine bug *Rhodnius prolixus* (Hemiptera: Reduviidae) by dsRNA ingestion or injection. *Insect Biochem Mol Biol* 36: 683–693.
  49. Zha W, Peng X, Chen R, Du B, Zhu L, et al. (2011) Knockdown of Midgut Genes by dsRNA-Transgenic Plant-Mediated RNA Interference in the Hemipteran Insect *Nilaparvata lugens*. *PLoS One* 6: e20504.
  50. Wang Y, Fan HW, Huang HJ, Xue J, Wu WJ, et al. (2012) Chitin synthase 1 gene and its two alternative splicing variants from two sap-sucking insects, *Nilaparvata lugens* and *Laodelphax striatellus* (Hemiptera: Delphacidae). *Insect Biochem Mol Biol* 42: 637–646.
  51. Ghanim M, Kongsadalov S, Czosnek H (2007) Tissue-specific gene silencing by RNA interference in the whitefly *Bemisia tabaci* (Gennadius). *Insect Biochem Mol Biol* 37: 732–738.
  52. Wuriyangan H, Rosa C, Falk BW (2011) Oral Delivery of Double-Stranded RNAs and siRNAs induces RNAi effects in the Potato/Tomato Psyllid, *Bactericera cockerelli*. *PLoS One* 6: e27736.
  53. Pitino M, Coleman AD, Maffei ME, Ridout CJ, Hogenhout SA (2011) Silencing of Aphid genes by dsRNA feeding from plants. *PLoS One* 6: e25709.
  54. Halbert SE, Manjunath KL (2004) Asian citrus psyllids (*Sternorhyncha: Psyllidae*) and greening disease of citrus: A literature review and assessment of risk in Florida. *Fla Entomol* 87: 330–353.
  55. Teixeira DC, Saillard C, Eveillard S, Danet JL, da Costa PI, et al (2005) *Candidatus Liberibacter americanus*, associated with citrus huanglongbing (greening disease) in Sao Paulo State, Brazil. *Int J Syst Evol Microbiol* 55: 1857–1862.
  56. Bové JM (2006) Huanglongbing: a destructive, newly-emerging, century-old disease of citrus. *J Plant Pathol* 88: 7–37.
  57. Wang Z, Yin Y, Hu H, Yuan Q, Peng G, et al. (2006) Development and application of molecular-based diagnosis for *Candidatus Liberibacter asiaticus*, the causal pathogen of citrus huanglongbing. *Plant Pathol* 55: 630–638.
  58. Batool A, Iftikhar Y, Mughal SM, Khan MM, Jaskani MJ, et al. (2007) Citrus greening disease - A major cause of citrus decline in the world - A review. *Hortic Sci (Parague)* 34: 159–166.
  59. Manjunath KL, Halbert SE, Ramadugu C, Webb S, Lee RF (2008) Detection of *Candidatus Liberibacter asiaticus* in *Diaphorina citri* and its importance in the management of citrus huanglongbing in Florida. *Phytopathology* 98: 387–396.
  60. Hodges AW, Spreen TH (2012) Economic Impacts of Citrus Greening (HLB) in Florida, 2006/07–2010/11. Available: <http://edis-ufas.ufl.edu/fe903>. Accessed 20 January 2013.
  61. Halbert SE (2005) Pest Alert: Citrus Greening/Huanglongbing. Florida Department of Agriculture and Consumer Services, Division of Plant Industry. Available: <http://www.doacs.state.fl.us/pi/chrp/greening/citrusgreeningalert.html>. Accessed 21 January 2013.
  62. Garnier M, Jagoueix-Eveillard S, Cornje HF, Le Roux PR, Bové JM (2000) Genomic characterization of a *Liberibacter* present in an ornamental rutaceous tree, *Calodendrum capense*, in the Western Cape province of South Africa. Proposal of '*Candidatus Liberibacter africanus* subsp. *capensis*'. *Int J Syst Evol Microbiol* 50: 2119–2125.
  63. Skelley LH, Hoy MA (2004) A synchronous rearing method for the Asian citrus psyllid and its parasitoids in quarantine. *Biol. Control* 29: 14–23.
  64. Mead FW, Fasulo TR (1998) Asian Citrus Psyllid, *Diaphorina citri* Kuwayama (Insecta: Hemiptera: Psyllidae). Available: <http://edis.ifas.ufl.edu/pdf/IN/IN1600.pdf>. Accessed 22 January 2013.
  65. Grafton-Cardwell EE, Godfrey KE, Rogers ME, Childers CC, Stansly PA (2005) Available: Asian citrus psyllid. <http://ccpp.ucr.edu/news/PsyllidbrochureAug05.pdf>. Accessed 22 January 2013.
  66. Rogers ME, Stansly PA (2007) Biology and management of the Asian citrus psyllid, *Diaphorina citri* Kuwayama, in Florida Citrus. *EDIS*. Available: <http://edis.ifas.ufl.edu/IN668.pdf>. Accessed 23 January 2013.
  67. Majumdar A, Nesbitt N, Fadamiro H. (2009) Asian Citrus Psyllid. ANR-1341, *Alabama Cooperative Extension System*. Available: <http://www.aces.edu/pubs/docs/A/ANR-1341.pdf>. Accessed 23 January 2013.
  68. Larkin MA, Blackshields G, Brown NP, Chenna R, McGettigan PA et al. (2007) Clustal W and Clustal X version 2.0. *Bioinformatics*. 23: 2947–2948.
  69. Combet C, Jambon M, Deléage G, Geourjon C (2002) Geno3D: automatic comparative molecular modelling of protein. *Bioinformatics*. 18:213–214.
  70. Morera S, Lacombe ML, Xu Y, LeBras G, Janin J (1995) X-ray structure of human nucleoside diphosphate kinase B complexed with GDP at 2 Å resolution. *Structure*. 15: 1307–1314.
  71. Lascu L, Giartosio A, Ransac S, Erent M (2000) Quaternary structure of nucleoside diphosphate kinases. *J Bioenerg Biomembr*. 32: 227–36.
  72. Tian H, Peng H, Yao Q, Chen H, Xie Q, et al. (2009) Developmental Control of a lepidopteran pest *Spodoptera exigua* by ingestion of bacteria expressing dsRNA of a non-Midgut gene. *PLoS One* 4: e6225.
  73. Dearolf CR, Hersperger E, Shearn A (1988) Developmental consequences of *awd3*, a cell-autonomous lethal mutation of *Drosophila* induced by hybrid dysgenesis. *Dev Biol* 129: 159–168.
  74. Dearolf CR, Tripoulas N, Biggs J, Shearn A (1988) Molecular consequences of *awd3*, a cell-autonomous lethal mutation of *Drosophila* induced by hybrid dysgenesis. *Dev Biol* 129: 169–178.
  75. Liu S, Ding Z, Zhang C, Yang B, Liu Z (2010) Gene knockdown by intrathoracic injection of double-stranded RNA in the brown planthopper, *Nilaparvata lugens*. *Insect Biochem Mol Biol* 40: 666–671.
  76. Sivakumar S, Rajagopal R, Venkatesh GR, Srivastava A, Bhatmagar RK, (2007) Knockdown of aminopeptidase-N from *Helicoverpa armigera* larvae and in transfected Sf21 cells by RNA interference reveals its functional interaction with *Bacillus thuringiensis* insecticidal protein Cry1Ac. *J Biol Chem* 282: 7312–7319.
  77. Boucias DG (1998) Principles of insect pathology. Springer press; 1999 edition. 565 p.
  78. Nation JL (2001) Insect physiology and biochemistry. CRC Press, 496 p.
  79. Wikipedians B (2011) Introduction to Insects. Pedia Press. 266 p.
  80. Klowden MJ, Marc (2007) Physiological Systems in Insects. Academic Press; 2<sup>nd</sup> edition 688 p.
  81. Matsumura F (1975) Toxicology of insecticides. Plenum Press, New York, USA.
  82. Noble-Nesbitt J (1970) Structural aspects of penetration through insect cuticles. *J Pestic Sci* 1: 204–208.
  83. White IM, Dickinson ID (1985) Nymphal taxonomy and systematics of Psylloidea (Homoptera) *Bull Br Mus Nat Hist Entomol* 50: 153–301.
  84. Arakane Y, Muthukrishnan S, Kramer KJ, Specht CA, Tomoyasu Y, et al. (2005) The *Tribolium* chitin synthase genes TcCHS1 and TcCHS2 are specialized for synthesis of epidermal cuticle and midgut peritrophic matrix. *Insect Mol Biol* 14: 453–463.
  85. Boisson B, Jacques JC, Choumet V, Martin E, Xu J, et al. (2006) Gene silencing in mosquito salivary glands by RNAi. *FEBS Lett* 580: 1988–1992.
  86. Mao YB, Cai WJ, Wang JW, Hong GJ, Tao XY, et al. (2007) Silencing a cotton bollworm P450 monooxygenase gene by plant-mediated RNAi impairs larval tolerance of gossypol. *Nat Biotech* 25: 1307–1313.
